# Supplementary material
Source: PubMed Central journal article supplement (PMC1895250)

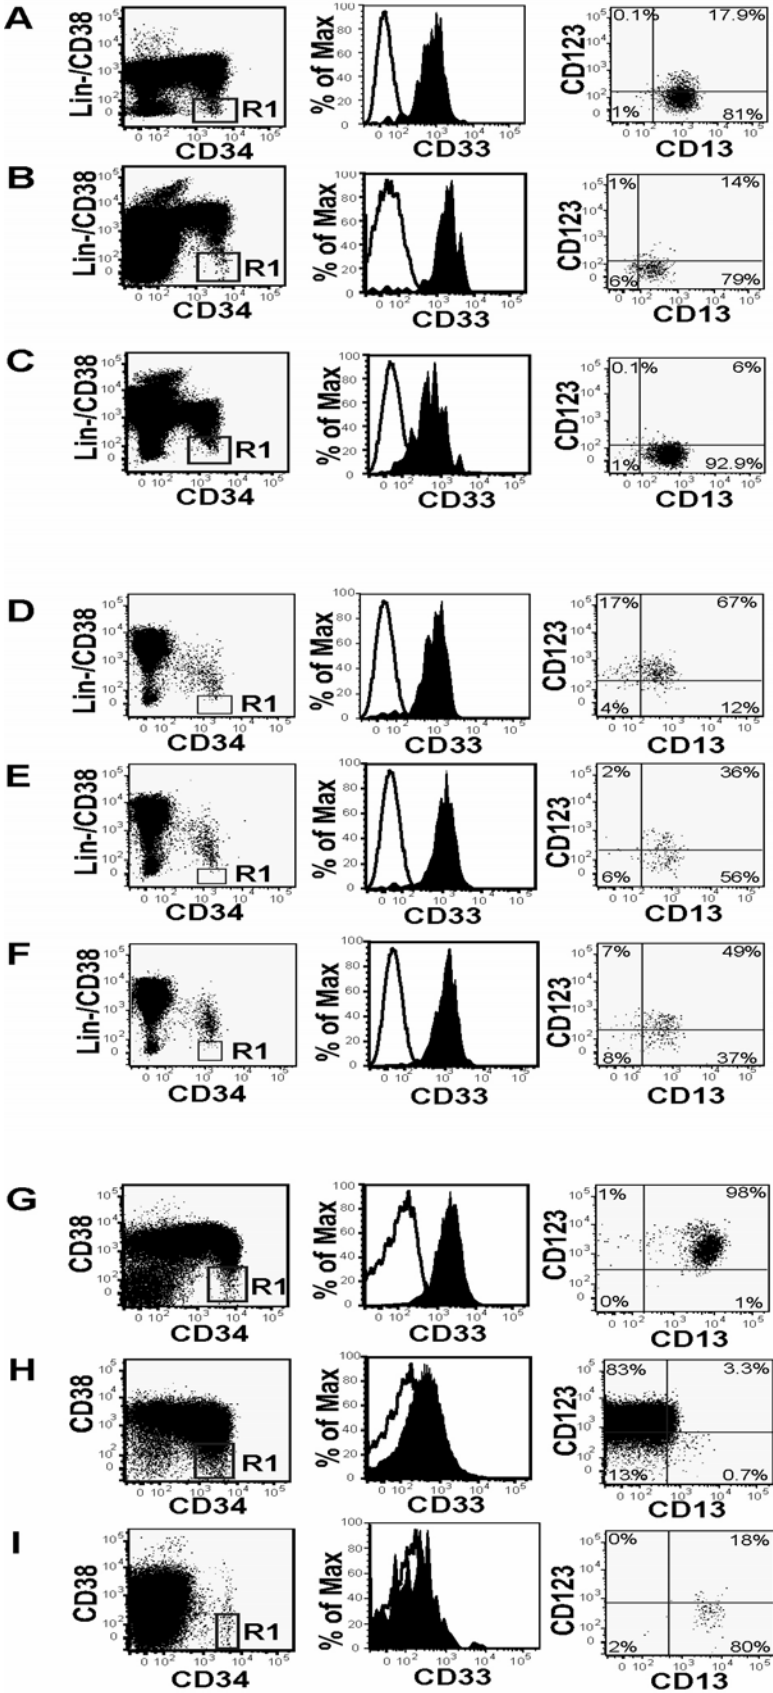

Supplement: blood_2005-03-1072_1.pdf [file blood_2005-03-1072_1.pdf]
